# Supplementary material
Source: PubMed Central journal article supplement (PMC7567343)
Supplement: NIHMS1621289-supplement-1.pdf [file NIHMS1621289-supplement-1.pdf]

## Supporting Information

### A Patch of Detachable Hybrid Microneedle Depot for Localized Delivery of Mesenchymal Stem Cells in Regeneration Therapy

*KangJu Lee<sup>\*</sup>, Yumeng Xue, Junmin Lee, Han-Jun Kim, Yaowen Liu, Peyton Tebon, Einollah Sarikhani, Wujin Sun, Shiming Zhang, Reihaneh Haghniaz, Betül Çelebi-Saltik, Xingwu Zhou, Serge Ostrovidov, Samad Ahadian, Nureddin Ashammakhi, Mehmet R. Dokmeci, Ali Khademhosseini<sup>\*</sup>*

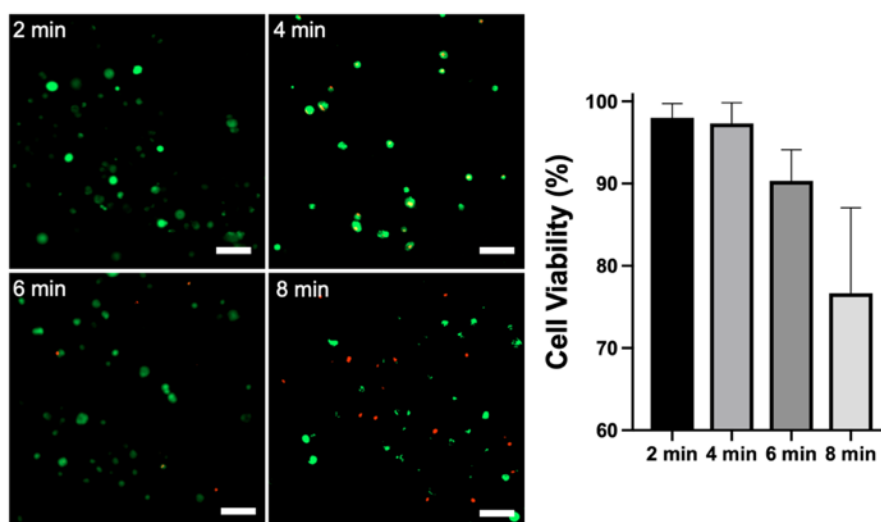

**Figure S1.** The viability of MSC within GMM with respect to the different crosslinking time from 2 to 8 min using  $14 \text{ mW/cm}^2$  of UV (scale bar =  $100 \mu\text{m}$ ). All data are presented as the mean  $\pm$  SD.

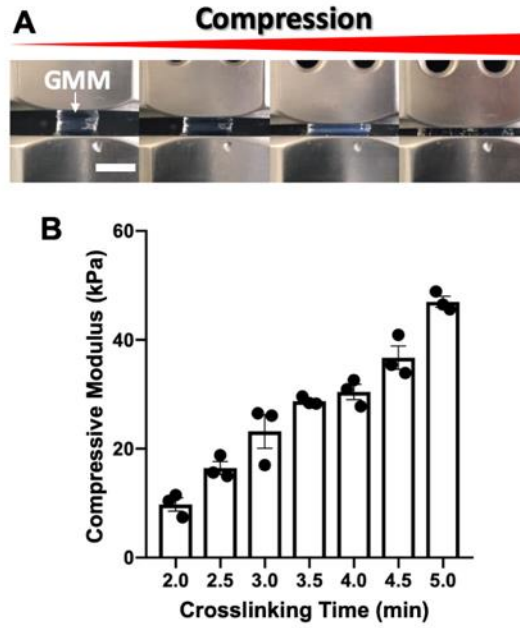

**Figure S2.** (A) Representative images of compression test of GMM disk (scale bar = 10 mm). (B) Raw data of compressive modulus of GMM disks with respect to the UV crosslinking time. All data are presented as the mean  $\pm$  SD.

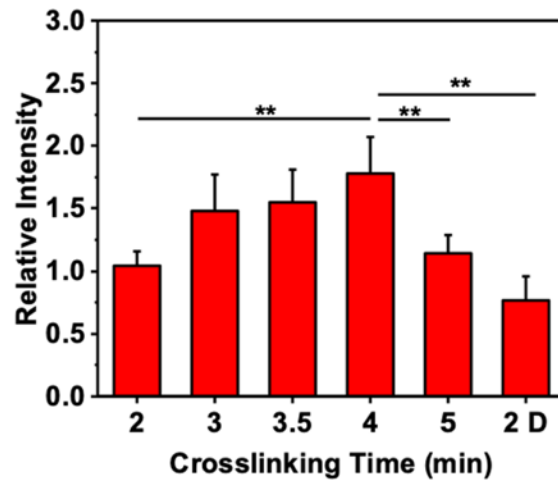

**Figure S3** Results of a CCK-8 assay of MSC viability within GMMs crosslinked for 2 to 5 min. The 2D control is MSCs grown on GelMA substrate crosslinked for 4 min. \*\* $p < 0.01$ , All data are presented as the mean  $\pm$  SD.

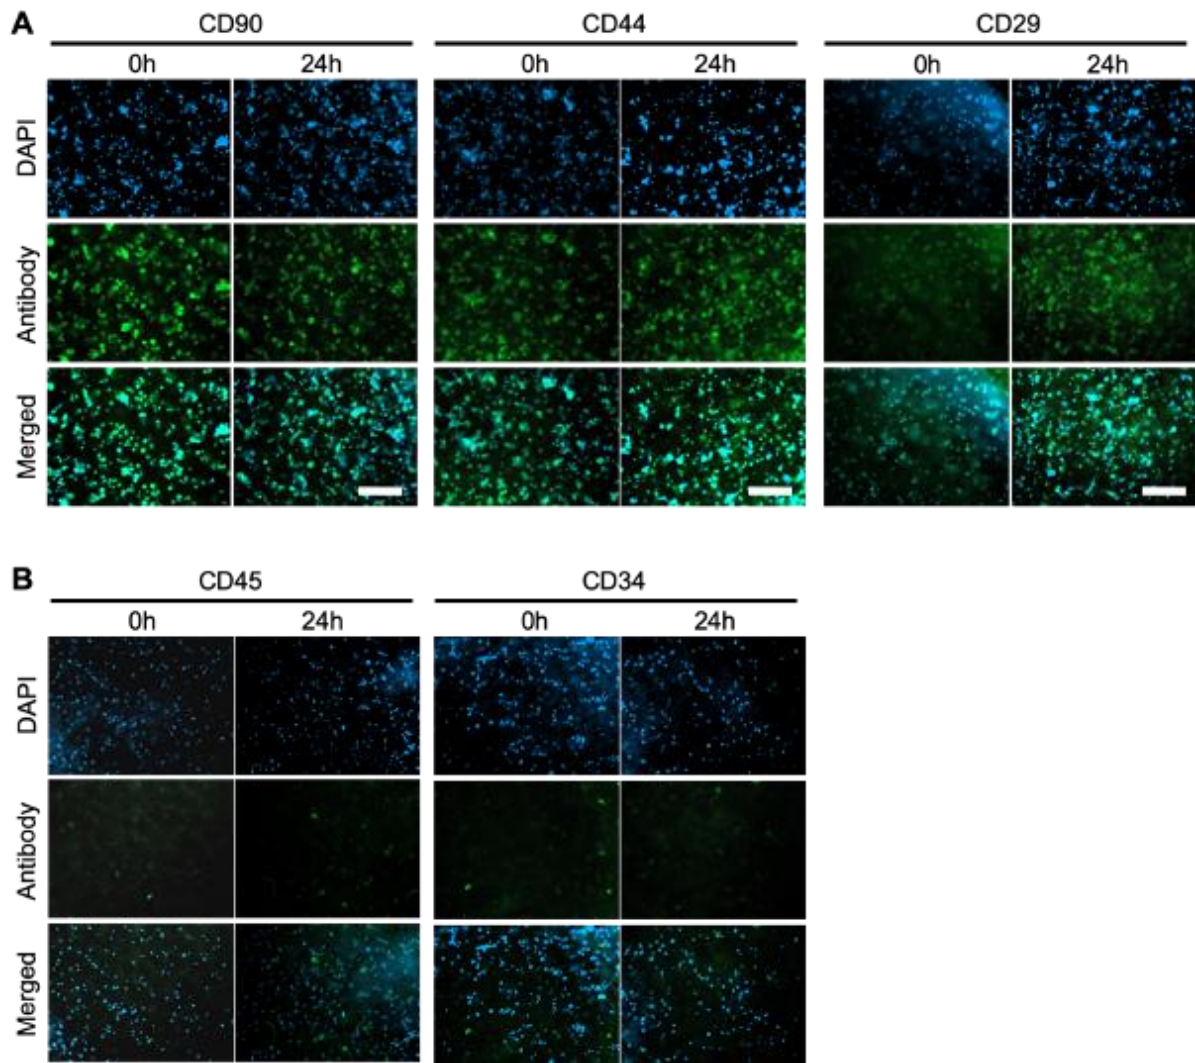

**Figure S4** Representative images of histologic samples stained by stemness-related antibodies in Figure 5E.

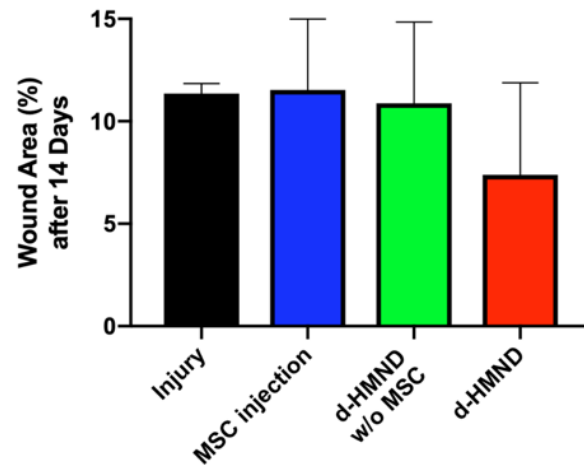

**Figure S5** Wound area of each group after 2 weeks.
